# Supplementary material
Source: publisher figshare collection journal article supplement (https://gsajournals.figshare.com/ndownloader/files/25512545)
Supplement: Supplementary file 1 [file 25512545]

## Sheet: Sheet1
Probe #	Probe sequence (5'-> 3')
1	GTTGGTCAAGTGACTGTAAC
2	CCATCGCATTCTCAATGTTT
3	CCATTCTTACTCTACTCTTA
4	TTATGCCCACCAAAACGAGA
5	ATATGCACGCTACGACGATC
6	AAGCGAGGAGCTGCAATGAT
7	GAAAACTCGATGCCATGGGA
8	GTTCGTCCAGAACCAGAAAC
9	AGGTCAAAGTTGGACGAGCG
10	GCAACGAGATAATGGTCGGA
11	GTATGCATTTTGCATAGACT
12	GCTGCGAATGCATTGGGAAA
13	TACAAGTGTGTTTTTGCGCA
14	TTGGTTTTGGCTTTTTGTGT
15	TGTCGTCATTGTTGTTTTGG
16	GCACACAATCTAATTTCCCA
17	CTCGTTTCACCGACTTGTCG
18	CCCATGGACATTCACTCGAT
19	ATTTATGTTAAGTGCTCGCT
20	TTTTTTTTCGCTTTTGGTGC
21	ATGAACGCTTATTTCGCCTC
22	GCCTCCTCTTTTGTTAAATT
23	CTGCAGATGGTTGAAAGGGA
24	GTATATAGAGTCGATTGTGT
25	ACCAAAGACAACATAGCACC
26	TTATCACTCATACAGCTAGA
27	TCGGTAAGCTAGCTTTATGA
28	CTGGGCAGACGCTAATATTA
29	AAGTATACGCAATGTGGGCC
30	GCTTATTTTGATGTGTTTCC
31	ATGCATGGTGTACATATGGG
32	TTGGCCGTAAAGCCAAACTG
33	GGTTTTTTTGCTTGCCAAAG
34	AACTTACTCGTTTGTACGCG
35	CCATGCAAAGGTCGTATCTA
36	GTTCGCAGGGGGTAAAACAA
37	TGTCTTTTCCACCTCTTTTG
38	CAACGTCATTGACTGCTGTT
39	AATCAGTGTTCATCAGGTGC
40	GCCTGCAAATGATCTTTCAT
41	AGCTTGCCGTTATTATCTTG
42	GTTGTTGCTATCCGAAACTT
43	TTTCCTCTAAAGTTCCTAGC
44	GTTCGACGGCTTTAAGAGTG
45	GTTTATGGTGTTTACAAGTT
46	ATGTTATTTGCTTACTTTCC
47	ATAACTTATTGCACGCTATT
48	GCTTTCTATTAAGCTGATCA
